# Supplementary material
Source: PubMed Central journal article supplement (PMC5643006)
Supplement: NIHMS877745-supplement-Supplemental_Digital_Content_1.pdf [file NIHMS877745-supplement-Supplemental_Digital_Content_1.pdf]

## **Supplemental Digital Content 2**

### **Exclusion criteria for urgent, emergent, and emergency procedures**

Surgeries were classified as “emergency” if there was within three days prior to surgery an inpatient file entry with an ICD-9 diagnosis code for bowel obstruction (56089, 5609), perforation (56983), hemorrhage (5693, 5789), peritonitis (5670, 5672, 5678, 5679), or inpatient source of admission (7) emergency room, or inpatient admission type (1) emergency, or an NCH claim where HCPCS indicates emergency room visit (99281-99285), or BETOS code (M3) emergency visit, or place of service (23) emergency room, or an outpatient claim HCPCS (99281-99285) or outpatient revenue center is (0450-0459, 0981) emergency room other, or emergency room professional fees.
